# Supplementary material for: Ecology and Machine Learning-Based Classification Models of Gut Microbiota and Inflammatory Markers May Evaluate the Effects of Probiotic Supplementation in Patients Recently Recovered from COVID-19
Source: MDPI journal article supplement (doi:10.3390/ijms24076623), 2023-04-01
Supplement: s1 [file s1]

**Supplementary Table S2.** Frequency distribution of individual items for GSRS score.

| <b>Patients (n=19*)</b>         |                     |  | Summary statistics | Baseline      | Visit 3        |
|---------------------------------|---------------------|--|--------------------|---------------|----------------|
| <b>1. Abdominal pains</b>       | No discomfort       |  | %, n               | 42.9% (6/14)  | 71.4% (10/14)  |
|                                 | Minor discomfort    |  | %, n               | 50.0% (7/14)  | 7.1% (1/14)    |
|                                 | Moderate discomfort |  | %, n               |               | 7.1% (1/14)    |
|                                 | Severe discomfort   |  | %, n               | 7.1% (1/14)   | 14.3% (2/14)   |
| <b>2. Heartburn</b>             | No discomfort       |  | %, n               | 92.9% (13/14) | 92.9% (13/14)  |
|                                 | Minor discomfort    |  | %, n               | 7.1% (1/14)   |                |
|                                 | Moderate discomfort |  | %, n               |               | 7.1% (1/14)    |
| <b>3. Acid Reflux</b>           | No discomfort       |  | %, n               | 78.6% (11/14) | 78.6% (11/14)  |
|                                 | Minor discomfort    |  | %, n               | 14.3% (2/14)  | 21.4% (3/14)   |
|                                 | Moderate discomfort |  | %, n               | 7.1% (1/14)   |                |
| <b>4. Hunger Pains</b>          | No discomfort       |  | %, n               | 35.7% (5/14)  | 50.0% (7/14)   |
|                                 | Minor discomfort    |  | %, n               | 35.7% (5/14)  | 35.7% (5/14)   |
|                                 | Moderate discomfort |  | %, n               | 28.6% (4/14)  | 14.3% (2/14)   |
| <b>5. Nausea</b>                | No discomfort       |  | %, n               | 92.9% (13/14) | 92.9% (13/14)  |
|                                 | Minor discomfort    |  | %, n               | 7.1% (1/14)   | 7.1% (1/14)    |
| <b>6. Rumbling</b>              | No discomfort       |  | %, n               | 58.3% (7/12)  | 66.7% (8/12)   |
|                                 | Minor discomfort    |  | %, n               | 41.7% (5/12)  | 33.3% (4/12)   |
| <b>7. Bloating</b>              | No discomfort       |  | %, n               | 66.7% (8/12)  | 66.7% (8/12)   |
|                                 | Minor discomfort    |  | %, n               | 16.7% (2/12)  | 16.7% (2/12)   |
|                                 | Mild discomfort     |  | %, n               | 8.3% (1/12)   | 8.3% (1/12)    |
|                                 | Moderate discomfort |  | %, n               | 8.3% (1/12)   | 8.3% (1/12)    |
| <b>8. Burping</b>               | No discomfort       |  | %, n               | 83.3% (10/12) | 83.3% (10/12)  |
|                                 | Minor discomfort    |  | %, n               | 16.7% (2/12)  | 16.7% (2/12)   |
| <b>9. Passing gas or flatus</b> | No discomfort       |  | %, n               | 38.5% (5/13)  | 38.5% (5/13)   |
|                                 | Minor discomfort    |  | %, n               | 30.8% (4/13)  | 53.8% (7/13)   |
|                                 | Mild discomfort     |  | %, n               | 15.4% (2/13)  | 7.7% (1/13)    |
|                                 | Moderate discomfort |  | %, n               | 15.4% (2/13)  |                |
| <b>10. Constipation</b>         | No discomfort       |  | %, n               | 76.9% (10/13) | 76.9% (10/13)  |
|                                 | Minor discomfort    |  | %, n               |               | 15.4% (2/13)   |
|                                 | Mild discomfort     |  | %, n               | 7.7% (1/13)   |                |
|                                 | Moderate discomfort |  | %, n               | 15.4% (2/13)  | 7.7% (1/13)    |
| <b>11. Diarrhea</b>             | No discomfort       |  | %, n               | 92.3% (12/13) | 100.0% (13/13) |
|                                 | Minor discomfort    |  | %, n               | 7.7% (1/13)   |                |
| <b>12. Loose stools</b>         | No discomfort       |  | %, n               | 92.3% (12/13) | 100.0% (13/13) |
|                                 | Minor discomfort    |  | %, n               | 7.7% (1/13)   |                |

**Patients (n=19\*)**

|                                                            |                     | Summary statistics | Baseline      | Visit 3       |
|------------------------------------------------------------|---------------------|--------------------|---------------|---------------|
| <b>13. Hard stools</b>                                     | No discomfort       | %, n               | 69.2% (9/13)  | 69.2% (9/13)  |
|                                                            | Minor discomfort    | %, n               | 7.7% (1/13)   | 30.8% (4/13)  |
|                                                            | Mild discomfort     | %, n               | 7.7% (1/13)   |               |
|                                                            | Moderate discomfort | %, n               | 7.7% (1/13)   |               |
|                                                            | Severe discomfort   | %, n               | 7.7% (1/13)   |               |
| <b>14. Urgent need to have a bowel movement</b>            | No discomfort       | %, n               | 76.9% (10/13) | 76.9% (10/13) |
|                                                            | Minor discomfort    | %, n               | 15.4% (2/13)  | 15.4% (2/13)  |
|                                                            | Moderate discomfort | %, n               | 7.7% (1/13)   | 7.7% (1/13)   |
| <b>15. Sensation of not completely emptying the bowels</b> | No discomfort       | %, n               | 75.0% (9/12)  | 83.3% (10/12) |
|                                                            | Minor discomfort    | %, n               | 16.7% (2/12)  | 8.3% (1/12)   |
|                                                            | Mild discomfort     | %, n               | 8.3% (1/12)   |               |
|                                                            | Moderate discomfort | %, n               |               | 8.3% (1/12)   |

\*The number refers to all patients (19) that have completed the protocol
