# Supplementary material for: Ecology and Machine Learning-Based Classification Models of Gut Microbiota and Inflammatory Markers May Evaluate the Effects of Probiotic Supplementation in Patients Recently Recovered from COVID-19
Source: MDPI journal article supplement (doi:10.3390/ijms24076623), 2023-04-01
Supplement: s1 [file s1]

**Supplementary Table S1.** GSRS global and single items scores.

| <b>Patients (n=19*)</b>  |                    |                     |                     |                              |         |
|--------------------------|--------------------|---------------------|---------------------|------------------------------|---------|
|                          | Summary statistics | Baseline (N=19)     | Visit 3 (N=19)      | Variation (Visit 3-Baseline) | P value |
| <b>Variation of GSRS</b> | N                  | 11 (100.0%)         | 11 (100.0%)         | 11 (68.8%)                   | 0.901   |
|                          | Mean $\pm$ SD      | 19.55 $\pm$ 5.502   | 19.36 $\pm$ 5.390   | -0.18 $\pm$ 4.750            |         |
|                          | Median (Q1-Q3)     | 17.00 (15.00-23.00) | 18.00 (15.00-21.00) | 0.00 (-4.00-2.00)            |         |
|                          | Min-Max            | 15.0-31.0           | 15.0-31.0           | -9.0-7.0                     |         |
|                          | Missing            | 0                   | 0                   | 5                            |         |
| <b>Abdominal pains</b>   | N                  | 14 (100.0%)         | 14 (100.0%)         | 14 (77.8%)                   | 1.000   |
|                          | Mean $\pm$ SD      | 1.79 $\pm$ 1.051    | 1.86 $\pm$ 1.562    | 0.07 $\pm$ 1.385             |         |
|                          | Median (Q1-Q3)     | 2.00 (1.00-2.00)    | 1.00 (1.00-2.00)    | 0.00 (-1.00-0.00)            |         |
|                          | Min-Max            | 1.0-5.0             | 1.0-5.0             | -1.0-4.0                     |         |
|                          | Missing            | 0                   | 0                   | 4                            |         |
| <b>Heartburn</b>         | N                  | 14 (100.0%)         | 14 (100.0%)         | 14 (77.8%)                   | 1.000   |
|                          | Mean $\pm$ SD      | 1.07 $\pm$ 0.267    | 1.21 $\pm$ 0.802    | 0.14 $\pm$ 0.864             |         |
|                          | Median (Q1-Q3)     | 1.00 (1.00-1.00)    | 1.00 (1.00-1.00)    | 0.00 (0.00-0.00)             |         |
|                          | Min-Max            | 1.0-2.0             | 1.0-4.0             | -1.0-3.0                     |         |
|                          | Missing            | 0                   | 0                   | 4                            |         |
| <b>Acid Reflux</b>       | N                  | 14 (100.0%)         | 14 (100.0%)         | 14 (77.8%)                   | 1.000   |
|                          | Mean $\pm$ SD      | 1.36 $\pm$ 0.842    | 1.21 $\pm$ 0.426    | -0.14 $\pm$ 0.535            |         |
|                          | Median (Q1-Q3)     | 1.00 (1.00-1.00)    | 1.00 (1.00-1.00)    | 0.00 (0.00-0.00)             |         |
|                          | Min-Max            | 1.0-4.0             | 1.0-2.0             | -2.0-0.0                     |         |
|                          | Missing            | 0                   | 0                   | 4                            |         |
| <b>Hunger Pains</b>      | N                  | 14 (100.0%)         | 14 (100.0%)         | 14 (77.8%)                   | 0.313   |
|                          | Mean $\pm$ SD      | 1.93 $\pm$ 0.829    | 1.64 $\pm$ 0.745    | -0.29 $\pm$ 0.726            |         |
|                          | Median (Q1-Q3)     | 2.00 (1.00-3.00)    | 1.50 (1.00-2.00)    | 0.00 (-1.00-0.00)            |         |
|                          | Min-Max            | 1.0-3.0             | 1.0-3.0             | -2.0-1.0                     |         |
|                          | Missing            | 0                   | 0                   | 4                            |         |
| <b>Nausea</b>            | N                  | 14 (100.0%)         | 14 (100.0%)         | 14 (77.8%)                   | 1.000   |
|                          | Mean $\pm$ SD      | 1.07 $\pm$ 0.267    | 1.07 $\pm$ 0.267    | 0.00 $\pm$ 0.392             |         |
|                          | Median (Q1-Q3)     | 1.00 (1.00-1.00)    | 1.00 (1.00-1.00)    | 0.00 (0.00-0.00)             |         |
|                          | Min-Max            | 1.0-2.0             | 1.0-2.0             | -1.0-1.0                     |         |
|                          | Missing            | 0                   | 0                   | 4                            |         |
| <b>Rumbling</b>          | N                  | 12 (100.0%)         | 12 (100.0%)         | 12 (70.6%)                   | 1.000   |
|                          | Mean $\pm$ SD      | 1.42 $\pm$ 0.515    | 1.33 $\pm$ 0.492    | -0.08 $\pm$ 0.515            |         |
|                          | Median (Q1-Q3)     | 1.00 (1.00-2.00)    | 1.00 (1.00-2.00)    | 0.00 (0.00-0.00)             |         |
|                          | Min-Max            | 1.0-2.0             | 1.0-2.0             | -1.0-1.0                     |         |
|                          | Missing            | 0                   | 0                   | 5                            |         |
| <b>Bloated</b>           | N                  | 12 (100.0%)         | 12 (100.0%)         | 12 (70.6%)                   | 1.000   |

| Patients (n=19*)                            |                    |                  |                  |                              |         |
|---------------------------------------------|--------------------|------------------|------------------|------------------------------|---------|
|                                             | Summary statistics | Baseline (N=19)  | Visit 3 (N=19)   | Variation (Visit 3-Baseline) | P value |
|                                             | Mean ± SD          | 1.58 ± 0.996     | 1.58 ± 0.996     | 0.00 ± 0.603                 |         |
|                                             | Median (Q1-Q3)     | 1.00 (1.00-2.00) | 1.00 (1.00-2.00) | 0.00 (0.00-0.00)             |         |
|                                             | Min-Max            | 1.0-4.0          | 1.0-4.0          | -1.0-1.0                     |         |
|                                             | Missing            | 0                | 0                | 5                            |         |
|                                             |                    |                  |                  |                              |         |
| <b>Burping</b>                              | N                  | 12 (100.0%)      | 12 (100.0%)      | 12 (70.6%)                   | 1.000   |
|                                             | Mean ± SD          | 1.17 ± 0.389     | 1.17 ± 0.389     | 0.00 ± 0.603                 |         |
|                                             | Median (Q1-Q3)     | 1.00 (1.00-1.00) | 1.00 (1.00-1.00) | 0.00 (0.00-0.00)             |         |
|                                             | Min-Max            | 1.0-2.0          | 1.0-2.0          | -1.0-1.0                     |         |
|                                             | Missing            | 0                | 0                | 5                            |         |
| <b>Passing gas or flatus</b>                | N                  | 13 (100.0%)      | 13 (100.0%)      | 13 (76.5%)                   | 0.258   |
|                                             | Mean ± SD          | 2.08 ± 1.115     | 1.69 ± 0.630     | -0.38 ± 1.044                |         |
|                                             | Median (Q1-Q3)     | 2.00 (1.00-3.00) | 2.00 (1.00-2.00) | 0.00 (-1.00-0.00)            |         |
|                                             | Min-Max            | 1.0-4.0          | 1.0-3.0          | -2.0-1.0                     |         |
|                                             | Missing            | 0                | 0                | 4                            |         |
| <b>Constipation</b>                         | N                  | 13 (100.0%)      | 13 (100.0%)      | 13 (76.5%)                   | 0.750   |
|                                             | Mean ± SD          | 1.62 ± 1.193     | 1.38 ± 0.870     | -0.23 ± 0.927                |         |
|                                             | Median (Q1-Q3)     | 1.00 (1.00-1.00) | 1.00 (1.00-1.00) | 0.00 (0.00-0.00)             |         |
|                                             | Min-Max            | 1.0-4.0          | 1.0-4.0          | -3.0-1.0                     |         |
|                                             | Missing            | 0                | 0                | 4                            |         |
| <b>Diarrhea</b>                             | N                  | 13 (100.0%)      | 13 (100.0%)      | 13 (76.5%)                   | 1.000   |
|                                             | Mean ± SD          | 1.08 ± 0.277     | 1.00 ± 0.000     | -0.08 ± 0.277                |         |
|                                             | Median (Q1-Q3)     | 1.00 (1.00-1.00) | 1.00 (1.00-1.00) | 0.00 (0.00-0.00)             |         |
|                                             | Min-Max            | 1.0-2.0          | 1.0-1.0          | -1.0-0.0                     |         |
|                                             | Missing            | 0                | 0                | 4                            |         |
| <b>Loose stools</b>                         | N                  | 13 (100.0%)      | 13 (100.0%)      | 13 (76.5%)                   | 1.000   |
|                                             | Mean ± SD          | 1.08 ± 0.277     | 1.00 ± 0.000     | -0.08 ± 0.277                |         |
|                                             | Median (Q1-Q3)     | 1.00 (1.00-1.00) | 1.00 (1.00-1.00) | 0.00 (0.00-0.00)             |         |
|                                             | Min-Max            | 1.0-2.0          | 1.0-1.0          | -1.0-0.0                     |         |
|                                             | Missing            | 0                | 0                | 4                            |         |
| <b>Hard stools</b>                          | N                  | 13 (100.0%)      | 13 (100.0%)      | 13 (76.5%)                   | 0.375   |
|                                             | Mean ± SD          | 1.77 ± 1.363     | 1.31 ± 0.480     | -0.46 ± 1.330                |         |
|                                             | Median (Q1-Q3)     | 1.00 (1.00-2.00) | 1.00 (1.00-2.00) | 0.00 (-1.00-0.00)            |         |
|                                             | Min-Max            | 1.0-5.0          | 1.0-2.0          | -4.0-1.0                     |         |
|                                             | Missing            | 0                | 0                | 4                            |         |
| <b>Urgent need to have a bowel movement</b> | N                  | 13 (100.0%)      | 13 (100.0%)      | 13 (76.5%)                   | 1.000   |
|                                             | Mean ± SD          | 1.38 ± 0.870     | 1.38 ± 0.870     | 0.00 ± 0.913                 |         |
|                                             | Median (Q1-Q3)     | 1.00 (1.00-1.00) | 1.00 (1.00-1.00) | 0.00 (0.00-0.00)             |         |

| Patients (n=19*)                                       |                    |                  |                  |                              |         |
|--------------------------------------------------------|--------------------|------------------|------------------|------------------------------|---------|
|                                                        | Summary statistics | Baseline (N=19)  | Visit 3 (N=19)   | Variation (Visit 3-Baseline) | P value |
|                                                        | Min-Max            | 1.0-4.0          | 1.0-4.0          | -2.0-2.0                     |         |
|                                                        | Missing            | 0                | 0                | 4                            |         |
| <b>Sensation of not completely emptying the bowels</b> | N                  | 12 (100.0%)      | 12 (100.0%)      | 12 (75.0%)                   | 1.000   |
|                                                        | Mean ± SD          | 1.33 ± 0.651     | 1.33 ± 0.888     | 0.00 ± 0.603                 |         |
|                                                        | Median (Q1-Q3)     | 1.00 (1.00-1.50) | 1.00 (1.00-1.00) | 0.00 (0.00-0.00)             |         |
|                                                        | Min-Max            | 1.0-3.0          | 1.0-4.0          | -1.0-1.0                     |         |
|                                                        | Missing            | 0                | 0                | 4                            |         |

\*The number refers to all patients (19) that have completed the protocol
